# Supplementary material
Source: MDPI journal article supplement (https://www.mdpi.com/2073-4441/10/6/764)
Supplement: s1 [file s1]

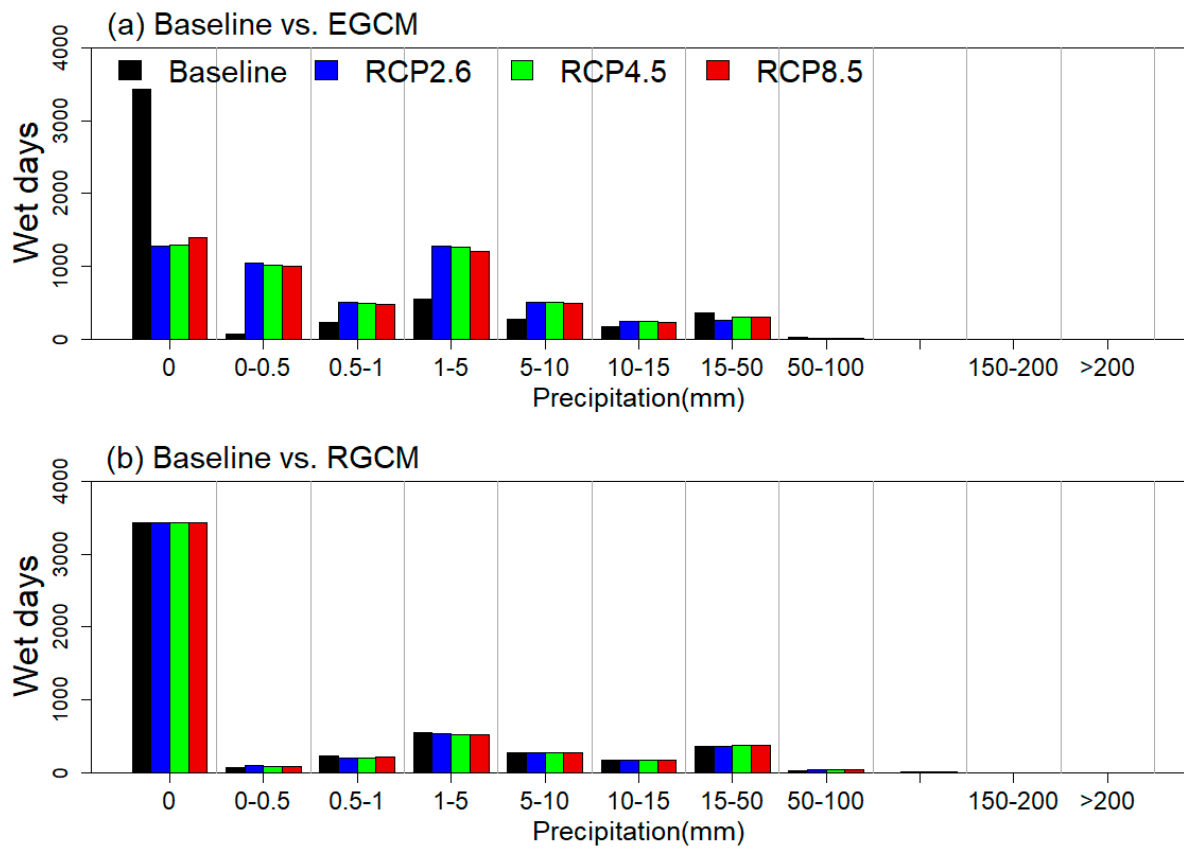

**Figure. S1.** The number of rain days of (a) EGCM and (b) RGCM at each bin for the entire period.

**Table S1.** Description of eight General Circulation Models (GCMs) used for this study

| Num. | Model            | Full name                                                                                                                      | Modeling Group                                                                                                                                                            |
|------|------------------|--------------------------------------------------------------------------------------------------------------------------------|---------------------------------------------------------------------------------------------------------------------------------------------------------------------------|
| 1    | BCC-CSM1-1.1     | Beijing Climate Center (BCC) -Climate System Model (CSM)                                                                       | Beijing Climate Center, China Meteorological Administration                                                                                                               |
| 2    | CCSM4.1          | Community Climate System Model (CCSM) 4.1                                                                                      | National Center for Atmospheric Research                                                                                                                                  |
| 3    | GFDL-ESM2G.1     | Geophysical Fluid Dynamics Laboratory (GFDL) -Earth System Model (ESM)                                                         | NOAA Geophysical Fluid Dynamics Laboratory                                                                                                                                |
| 4    | IPSL-CM5A-LR.1   | Institut Pierre-Simon Laplace (IPSL)-Climate Model(CM)5A-Low Resolution                                                        | Institut Pierre-Simon Laplace                                                                                                                                             |
| 5    | IPSL-CM5A-MR.1   | Institut Pierre-Simon Laplace (IPSL)- Climate Model(CM)5A-Medium Resolution                                                    | Institut Pierre-Simon Laplace                                                                                                                                             |
| 6    | MIROC-ESM-CHEM.1 | An atmospheric chemistry coupled version of Model for Interdisciplinary Research on Climate (MIROC) - Earth System Model (ESM) | Japan Agency for Marine-Earth Science and Technology, Atmosphere and Ocean Research Institute (The University of Tokyo), and National Institute for Environmental Studies |
| 7    | MIROC5.1         | Model for Interdisciplinary Research on Climate (MIROC)                                                                        | Atmosphere and Ocean Research Institute (The University of Tokyo), National Institute for Environmental Studies, and Japan Agency for Marine-Earth Science and Technology |
| 8    | NorESM1-M        | Norwegian Earth System Model (NorESM)                                                                                          | Norwegian Climate Centre                                                                                                                                                  |

$$\lambda E = \frac{\Delta \cdot (H_{net} - G) + \rho_{air} \cdot c_p \cdot [e_z^o - e_z]/r_a}{\Delta + \gamma \cdot (1 + r_c/r_a)} \quad (S1)$$

Where  $\lambda E$  is the latent heat flux density ( $\text{MJ}/\text{m}^2 \cdot \text{d}$ ),  $E$  is the depth rate evaporation ( $\text{mm}/\text{d}$ ),  $\Delta$  is the slope of the saturation vapor pressure-temperature ( $\text{kPa}/^\circ\text{C}$ ),  $H_{net}$  is the net radiation ( $\text{MJ}/\text{m}^2 \cdot \text{d}$ ),  $G$  is the heat flux density to the ground ( $\text{MJ}/\text{m}^2 \cdot \text{d}$ ),  $\rho_{air}$  is the air density ( $\text{kg}/\text{m}^3$ ),  $c_p$  is the specific heat at constant pressure ( $\text{MJ}/\text{kg}/^\circ\text{C}$ ),  $e_z^o$  is the saturation vapor pressure of air at height  $z$  ( $\text{kPa}$ ),  $e_z$  is the water vapor pressure of air at height  $z$  ( $\text{kPa}$ ),  $\gamma$  is the psychrometric constant ( $\text{kPa}/^\circ\text{C}$ ),  $r_c$  is the plant canopy resistance ( $\text{s}/\text{m}$ ), and  $r_a$  is the diffusion resistance of the air layer (aerodynamic resistance) ( $\text{s}/\text{m}$ ).
